# Supplementary material
Source: Springer Nature journal article supplement (https://www.springermedizin.de/resource/supplementary/12936_2009_945_MOESM2_ESM.pdf/9548594)
Supplement: MOESM2 [file 9548594]

**Table S2:** Results from this study compared to other studies evaluating correlation between the HLC catches and alternative traps for sampling female *An. gambiae s.l.* and *Cx.* species

| Source                            | Alternative collection method | <i>An. gambiae s.l.</i>     |        | <i>Cx.</i> species |        |
|-----------------------------------|-------------------------------|-----------------------------|--------|--------------------|--------|
|                                   |                               | Versus HLC reference method |        |                    |        |
| This study                        |                               | $r^2$                       | P      | $r^2$              | P      |
|                                   | ITT-B                         | 0.104                       | <0.001 | 0.049              | 0.003  |
|                                   | SRB                           | 0.115                       | 0.195  | 0.167              | <0.001 |
| Other studies                     |                               |                             |        |                    |        |
| Govella <i>et al.</i> , 2009 [8]  | ITT-B                         | 0.731                       | <0.001 | NA                 | NA     |
| Mbogo <i>et al.</i> , 1993 [23]   | CDC-light trap                | 0.409                       | <0.001 | NA                 | NA     |
| Magbity <i>et al.</i> , 2002 [22] | CDC- light trap               | 0.521                       | <0.001 | NA                 | NA     |
| Lines <i>et al.</i> , 1991 [3]    | CDC- light trap               | 0.723                       | <0.001 | NA                 | NA     |

CDC= Centre's for disease control

NA=Not applicable
